# Supplementary material for: Investigating evidence in support of validity and reliability for data collected with the meaningful learning in the laboratory instrument (MLLI)
Source: Royal Society of Chemistry journal article supplement (doi:10.1039/d3rp00121k), 2023-10-27
Supplement: d3rp00121k1.pdf [file d3rp00121k1.pdf]

Supporting Information for  
**Investigating Evidence in Support of Validity and Reliability for Data Collected with the  
Meaningful Learning in the Laboratory Instrument (MLLI)**

Elizabeth B. Vaughan, A. Montoya-Cowan, and Jack Barbera\* Department of Chemistry,  
Portland State University, Portland Oregon, 97207-0751, United States

\*Corresponding author: jack.barbera@pdx.edu

**Table of Contents**

|                                  |   |
|----------------------------------|---|
| Demographics.....                | 2 |
| Item Descriptive Statistics..... | 3 |
| Factor Loadings.....             | 7 |
| MLLIv2 Post-Course Items.....    | 9 |

## Demographics

Table S1. Self-reported demographics data of students who completed the pre-course MLLI and consented to participate in this study.

|                                | <b>Percentage of Students<br/>(n=869)</b> |
|--------------------------------|-------------------------------------------|
| <b>Gender Identity</b>         |                                           |
| Man                            | 36.02                                     |
| Woman                          | 59.72                                     |
| Other Identity                 | 2.99                                      |
| Prefer Not to Share            | 1.27                                      |
| <b>Race/Ethnicity</b>          |                                           |
| Non-URM                        | 63.06                                     |
| URM                            | 34.64                                     |
| Prefer Not to Share            | 2.30                                      |
| <b>Age Bracket</b>             |                                           |
| 18-22 (Traditional)            | 86.42                                     |
| 23+ (Nontraditional)           | 13.58                                     |
| <b>Major</b>                   |                                           |
| Biology                        | 36.25                                     |
| Chemistry                      | 3.57                                      |
| Biochemistry                   | 5.29                                      |
| Engineering                    | 15.19                                     |
| Other Science                  | 31.88                                     |
| Non-Science                    | 6.33                                      |
| Undecided                      | 1.50                                      |
| <b>University Status</b>       |                                           |
| Postbaccalaureate              | 3.11                                      |
| Undergraduate                  | 96.32                                     |
| Other                          | 0.58                                      |
| <b>Transfer Status</b>         |                                           |
| Transfer from 2-Year College   | 20.37                                     |
| <b>First Generation Status</b> |                                           |
| First Generation Student       | 32.80                                     |

## Item Descriptive Statistics

Table S2. MLLI item descriptive statistics for the training data set (n=434). Assigned categories for items include Cognitive (C), Affective (A), and Cognitive/Affective (C/A). Item wording includes positively worded items (+) and negatively worded items (-).

| Item | Assigned Category | Item Wording                                                              | Mean  | Standard Deviation | Skew  | Kurtosis |
|------|-------------------|---------------------------------------------------------------------------|-------|--------------------|-------|----------|
| 1    | C/A               | to learn chemistry that will be useful in my life.                        | 69.13 | 28.19              | -0.66 | 1.35     |
| 2    | A                 | to worry about finishing on time.                                         | 38.04 | 31.11              | 0.39  | 1.49     |
| 3    | C                 | to make decisions about what data to collect.                             | 74.06 | 23.22              | -0.75 | 1.11     |
| 4    | C/A               | to feel unsure about the purpose of the procedures.                       | 60.40 | 29.56              | -0.44 | 1.42     |
| 5    | C                 | to experience moments of insight.                                         | 76.66 | 22.52              | -0.96 | 1.08     |
| 6    | C                 | to be confused about how the instruments work.                            | 60.42 | 29.47              | -0.47 | 1.41     |
| 7    | C                 | to learn critical thinking skills.                                        | 81.24 | 21.45              | -1.35 | 1.03     |
| 8    | A                 | to be excited to do chemistry.                                            | 73.64 | 26.32              | -0.92 | 1.26     |
| 9    | A                 | to be nervous about making mistakes.                                      | 41.55 | 31.11              | 0.24  | 1.49     |
| 10   | C                 | to consider if my data makes sense.                                       | 80.22 | 21.74              | -1.29 | 1.04     |
| 11   | C                 | to think about what the molecules are doing.                              | 72.53 | 24.29              | -0.74 | 1.17     |
| 12   | C/A               | to feel disorganized.                                                     | 68.94 | 28.05              | -0.80 | 1.35     |
| 13   | A                 | to develop confidence in the laboratory.                                  | 80.97 | 21.56              | -1.36 | 1.03     |
| 14   | C/A               | to worry about getting good data.                                         | 36.57 | 28.33              | 0.48  | 1.36     |
| 15   | C                 | the procedures to be simple to do.                                        | 58.68 | 25.56              | -0.39 | 1.23     |
| 16   | C                 | to be confused about the underlying concepts.                             | 56.26 | 29.53              | -0.34 | 1.42     |
| 17   | C                 | to "get stuck" but keep trying.                                           | 72.51 | 25.77              | -0.80 | 1.24     |
| 17   | A                 | to be nervous when handling chemicals.                                    | 57.19 | 31.11              | -0.33 | 1.49     |
| 19   | C                 | to think about chemistry I already know.                                  | 70.77 | 27.18              | -0.74 | 1.30     |
| 20   | C/A               | to worry about the quality of my data.                                    | 37.55 | 29.39              | 0.46  | 1.41     |
| 21   | A                 | to be frustrated.                                                         | 49.35 | 32.58              | -0.13 | 1.56     |
| 22   | C                 | to interpret my data beyond only doing calculations.                      | 73.90 | 24.31              | -1.03 | 1.17     |
| 23   | ---               | Check Item.                                                               | ---   | ---                | ---   | ---      |
| 24   | C                 | to focus on procedures, not concepts.                                     | 53.87 | 25.85              | -0.07 | 1.24     |
| 25   | C                 | to use my observations to understand the behavior of atoms and molecules. | 78.08 | 21.71              | -1.03 | 1.04     |
| 26   | C                 | to make mistakes and try again.                                           | 82.01 | 22.08              | -1.36 | 1.06     |
| 27   | C/A               | to be intrigued by the instruments.                                       | 68.93 | 26.05              | -0.63 | 1.25     |
| 28   | A                 | to feel intimidated.                                                      | 55.18 | 31.76              | -0.23 | 1.52     |
| 29   | C                 | to be confused about what my data mean.                                   | 56.19 | 28.53              | -0.31 | 1.37     |
| 30   | A                 | to be confident when using equipment.                                     | 71.69 | 22.57              | -0.63 | 1.08     |
| 31   | C                 | to learn problem solving skills.                                          | 82.17 | 20.77              | -1.47 | 1.00     |

## Factor Loadings

Table S3. Standardized factor loadings for Model A (30 items) and Model A2 (20 items) using the training data set (n = 434). Three dashes (---) indicate that an item was not included in the model.

| <b>Standardized Factor Loadings</b>  |                |                 |
|--------------------------------------|----------------|-----------------|
|                                      | <b>Model A</b> | <b>Model A2</b> |
| <b>Cognitive Items</b>               |                |                 |
| 3                                    | 0.499          | 0.461           |
| 5                                    | 0.634          | 0.612           |
| 6                                    | 0.217          | 0.355           |
| 7                                    | 0.777          | 0.766           |
| 10                                   | 0.469          | ---             |
| 11                                   | 0.655          | 0.622           |
| 15                                   | -0.061         | ---             |
| 16                                   | 0.279          | 0.422           |
| 17                                   | 0.260          | ---             |
| 19                                   | 0.465          | ---             |
| 22                                   | 0.579          | 0.518           |
| 24                                   | 0.204          | ---             |
| 25                                   | 0.726          | 0.672           |
| 26                                   | 0.317          | ---             |
| 29                                   | 0.242          | 0.376           |
| 31                                   | 0.746          | 0.755           |
| <b>Affective Items</b>               |                |                 |
| 2                                    | 0.644          | ---             |
| 8                                    | 0.427          | 0.732           |
| 9                                    | 0.714          | 0.345           |
| 13                                   | 0.379          | 0.699           |
| 18                                   | 0.505          | ---             |
| 21                                   | 0.740          | 0.514           |
| 28                                   | 0.725          | 0.441           |
| 30                                   | 0.423          | 0.566           |
| <b>Cognitive and Affective Items</b> |                |                 |
| 1                                    | 0.288          | 0.531           |
| 4                                    | 0.694          | 0.428           |
| 12                                   | 0.680          | 0.484           |
| 14                                   | 0.627          | ---             |
| 20                                   | 0.642          | ---             |
| 27                                   | 0.108          | 0.424           |

Table S4. Standardized factor loadings for Model B (28 items), Model B2 (20 items), and Model B3 (16 items) using the training data set (n = 434). Three dashes (---) indicate that an item was not included in the model.

| <b>Standardized Factor Loadings</b> |                |                 |                 |
|-------------------------------------|----------------|-----------------|-----------------|
|                                     | <b>Model B</b> | <b>Model B2</b> | <b>Model B3</b> |
| <b>Positive Items</b>               |                |                 |                 |
| 1                                   | 0.580          | 0.590           | 0.606           |
| 3                                   | 0.495          | 0.479           | 0.475           |
| 5                                   | 0.647          | 0.646           | 0.653           |
| 7                                   | 0.792          | 0.795           | ---             |
| 8                                   | 0.722          | 0.731           | 0.745           |
| 10                                  | 0.448          | ---             | ---             |
| 11                                  | 0.649          | 0.644           | ---             |
| 13                                  | 0.720          | 0.726           | 0.720           |
| 17                                  | --             | ---             | ---             |
| 19                                  | 0.454          | ---             | ---             |
| 22                                  | 0.556          | 0.538           | 0.526           |
| 25                                  | 0.686          | 0.672           | 0.661           |
| 26                                  | 0.303          | ---             | ---             |
| 27                                  | 0.524          | 0.519           | 0.526           |
| 30                                  | 0.533          | 0.541           | ---             |
| 31                                  | 0.768          | 0.772           | 0.750           |
| <b>Negative Items</b>               |                |                 |                 |
| 2                                   | 0.603          | ---             | ---             |
| 4                                   | 0.719          | 0.717           | 0.721           |
| 6                                   | 0.752          | 0.763           | 0.762           |
| 9                                   | 0.690          | 0.644           | ---             |
| 12                                  | 0.692          | 0.709           | 0.717           |
| 14                                  | 0.580          | ---             | ---             |
| 15                                  | --             | ---             | ---             |
| 16                                  | 0.769          | 0.792           | 0.799           |
| 18                                  | 0.542          | ---             | ---             |
| 20                                  | 0.611          | ---             | ---             |
| 21                                  | 0.742          | 0.747           | 0.739           |
| 24                                  | 0.426          | ---             | ---             |
| 28                                  | 0.718          | 0.717           | 0.695           |
| 29                                  | 0.757          | 0.777           | 0.784           |

Table S5. Standardized factor loadings for Model C (20 items) using the training data set (n = 434). Three dashes (---) indicate that an item was not included in the model.

| <b>Standardized Factor Loadings</b>  |                |                               |
|--------------------------------------|----------------|-------------------------------|
|                                      | <b>Model C</b> | <b>Negative Method Factor</b> |
| <b>Cognitive Items</b>               |                |                               |
| 3                                    | 0.485          | ---                           |
| 5                                    | 0.648          | ---                           |
| 6                                    | 0.001          | 0.771                         |
| 7                                    | 0.795          | ---                           |
| 11                                   | 0.666          | ---                           |
| 16                                   | 0.072          | 0.780                         |
| 22                                   | 0.564          | ---                           |
| 25                                   | 0.702          | ---                           |
| 29                                   | 0.021          | 0.779                         |
| 31                                   | 0.755          | ---                           |
| <b>Affective Items</b>               |                |                               |
| 8                                    | 0.627          | ---                           |
| 9                                    | -0.030         | 0.661                         |
| 13                                   | 0.812          | ---                           |
| 21                                   | 0.116          | 0.718                         |
| 28                                   | 0.099          | 0.701                         |
| 30                                   | 0.615          | ---                           |
| <b>Cognitive and Affective Items</b> |                |                               |
| 1                                    | 0.323          | ---                           |
| 4                                    | 0.126          | 0.708                         |
| 12                                   | 0.170          | 0.692                         |
| 27                                   | 0.794          | ---                           |

Table S6. Standardized factor loadings for the MLLiv2 (Model B3, 16 items) using the training data set (n = 434), testing data set (n = 435), and post-course data set (n = 622).

| <b>Standardized Factor Loadings</b> |                                                                           |                 |                |                    |
|-------------------------------------|---------------------------------------------------------------------------|-----------------|----------------|--------------------|
|                                     |                                                                           | <b>Training</b> | <b>Testing</b> | <b>Post-Course</b> |
| <b>Positive Items</b>               |                                                                           |                 |                |                    |
| 1                                   | to learn chemistry that will be useful in my life.                        | 0.606           | 0.609          | 0.665              |
| 2                                   | to make decisions about what data to collect.                             | 0.475           | 0.541          | 0.427              |
| 3                                   | to experience moments of insight.                                         | 0.653           | 0.677          | 0.677              |
| 4                                   | to be excited to do chemistry.                                            | 0.745           | 0.700          | 0.763              |
| 5                                   | to develop confidence in the laboratory.                                  | 0.720           | 0.694          | 0.730              |
| 6                                   | to interpret my data beyond only doing calculations.                      | 0.526           | 0.548          | 0.572              |
| 7                                   | to use my observations to understand the behavior of atoms and molecules. | 0.661           | 0.729          | 0.616              |
| 8                                   | to be intrigued by the instruments.                                       | 0.526           | 0.600          | 0.521              |
| 9                                   | to learn chemistry that will be useful in my life.                        | 0.750           | 0.750          | 0.674              |
| <b>Negative Items</b>               |                                                                           |                 |                |                    |
| 10                                  | to feel unsure about the purpose of the procedures.                       | 0.721           | 0.735          | 0.670              |
| 11                                  | to be confused about how the instruments work.                            | 0.762           | 0.764          | 0.699              |
| 12                                  | to feel disorganized.                                                     | 0.717           | 0.675          | 0.697              |
| 13                                  | to be confused about the underlying concepts.                             | 0.799           | 0.806          | 0.746              |
| 14                                  | to be frustrated.                                                         | 0.739           | 0.700          | 0.717              |
| 15                                  | to feel intimidated.                                                      | 0.695           | 0.670          | 0.693              |
| 16                                  | to be confused about what my data mean.                                   | 0.784           | 0.780          | 0.668              |

Table S7. Standardized factor loadings for each individual factor of the MLLiv2 using the training data (n=434).

| <b>Standardized Factor Loadings</b> |       |                 |       |
|-------------------------------------|-------|-----------------|-------|
| <b>Positive</b>                     |       | <b>Negative</b> |       |
| 1                                   | 0.605 | 10              | 0.718 |
| 2                                   | 0.479 | 11              | 0.766 |
| 3                                   | 0.660 | 12              | 0.712 |
| 4                                   | 0.739 | 13              | 0.799 |
| 5                                   | 0.714 | 14              | 0.736 |
| 6                                   | 0.531 | 15              | 0.696 |
| 7                                   | 0.661 | 16              | 0.788 |
| 8                                   | 0.535 |                 |       |
| 9                                   | 0.749 |                 |       |



MLLIv2 Post-Course Items

Table S8. MLLIv2 Post-Assessment factors and items.

| <b>Meaningful Learning in the Laboratory Instrument – Version 2 (MLLIv2)</b> |                                                                             |
|------------------------------------------------------------------------------|-----------------------------------------------------------------------------|
| <b>Post-Course Item Stem</b>                                                 | <i>When I performed experiments in my chemistry laboratory course, I...</i> |
| <b>Positive Items</b>                                                        |                                                                             |
|                                                                              | learned chemistry that will be useful in my life.                           |
|                                                                              | made decisions about what data to collect.                                  |
|                                                                              | experienced moments of insight.                                             |
|                                                                              | was excited to do chemistry.                                                |
|                                                                              | developed confidence in the laboratory.                                     |
|                                                                              | interpreted my data beyond only doing calculations.                         |
|                                                                              | used my observations to understand the behavior of atoms and molecules.     |
|                                                                              | was intrigued by the instruments.                                           |
|                                                                              | learned problem solving skills.                                             |
| <b>Negative Items</b>                                                        |                                                                             |
|                                                                              | felt unsure about the purpose of the procedures.                            |
|                                                                              | was confused about how the instruments work.                                |
|                                                                              | felt disorganized.                                                          |
|                                                                              | was confused about the underlying concepts.                                 |
|                                                                              | was frustrated.                                                             |
|                                                                              | felt intimidated.                                                           |
|                                                                              | was confused about what my data mean.                                       |
